# Phospholipase Dα1 acts as a negative regulator of high Mg<sup>2+</sup>-induced leaf senescence in Arabidopsis.

Daniela Kocourková, Kristýna Kroumanová, Tereza Podmanická, Michal Daněk and Jan Martinec\*

Institute of Experimental Botany of the Czech Academy of Sciences, CZ-16502, Prague, Czech Republic

\*To whom correspondence should be addressed: [martinec@ueb.cas.cz](mailto:martinec@ueb.cas.cz)

Jan Martinec

Institute of Experimental Botany of the Czech Academy of Sciences

Rozvojová 263

CZ-16502 Prague

Czech Republic

Email: [martinec@ueb.cas.cz](mailto:martinec@ueb.cas.cz)

Phone: +420 225 106 416

ORCID ID: 0000-0002-5675-1706

Running title: PLDα1 is a negative regulator of high Mg<sup>2+</sup>-induced senescence.

## Abstract

Magnesium is a macronutrient involved in essential cellular processes. Its deficiency or excess is a stress factor for plants, seriously affecting their growth and development and therefore, its accurate regulation is essential. Recently, we discovered that phospholipase Dα1 (PLDα1) activity is vital in the stress response to high-magnesium conditions in Arabidopsis roots. This study shows that PLDα1 acts as a negative regulator of high-Mg<sup>2+</sup>-induced leaf senescence in Arabidopsis. The level of phosphatidic acid produced by PLDα1 and the amount of PLDα1 in the leaves increase in plants treated with high Mg<sup>2+</sup>. A knockout mutant of PLDα1 (*plda1-1*), exhibits premature leaf senescence under high-Mg<sup>2+</sup> conditions. In *plda1-1* plants, higher accumulation of abscisic and jasmonic acid and impaired magnesium, potassium and phosphate homeostasis were observed under high-Mg<sup>2+</sup> conditions. High Mg<sup>2+</sup> also led to an increase of starch and proline content in Arabidopsis plants. While the starch content was higher in *plda1-1* plants, proline content was significantly lower in *plda1-1* compared with WT. Our results show that PLDα1 is essential for Arabidopsis plants to cope with the pleiotropic effects of high-Mg<sup>2+</sup> stress and delay the leaf senescence.

## Keywords

*Arabidopsis thaliana*, magnesium homeostasis, phospholipase D, leaf senescence, starch, proline, abscisic acid, jasmonic acid, cytokinins

## Introduction

Magnesium is a macronutrient involved in essential cellular processes such as photosynthesis, nucleic acid and protein synthesis, energy metabolism, etc. (Guo *et al.*, 2016). Its deficiency or, on the contrary, its excess is a stress factor for plants, seriously affecting plant growth and development. Therefore, accurate regulation of intracellular magnesium level is essential. The knowledge of the mechanisms activated in  $Mg^{2+}$  deficiency is relatively good. The mechanisms associated with the regulation of cellular  $Mg^{2+}$  under high- $Mg^{2+}$  conditions are less known. High concentrations of  $Mg^{2+}$  together with low concentrations of  $Ca^{2+}$  occur, for example, in serpentine soils. Recently, high-magnesium waters and soils have been considered as an emerging environmental and food security issues (Qadir *et al.*, 2018). For non-adapted plants, high- $Mg^{2+}$  conditions are strongly inhibitory to growth.

Magnesium is absorbed by plants in its ionic form from the soil. Plants growing in soils with high  $Mg^{2+}$  can mitigate  $Mg^{2+}$  toxicity by limiting internal  $Mg^{2+}$  accumulation and/or  $Mg^{2+}$  excretion from leaves. Sequestration of additional  $Mg^{2+}$  into the vacuole under high  $Mg^{2+}$  conditions appears to play a central role in tolerance to high  $Mg^{2+}$  (Hermans *et al.*, 2013). The involvement of a network of calcineurin B-like calcium sensor proteins (CBL) CBL2/3, CBL-interacting protein kinases (CIPK) CIPK3/9/23/26, and sucrose nonfermenting-1-related protein kinase2 (SnRK2) SRK2D/E/I in the high- $Mg^{2+}$  response of *Arabidopsis* has been shown (Chen *et al.*, 2018; Mogami *et al.*, 2015; Tang *et al.*, 2015). Based on the altered sensitivity of the corresponding knock-out mutants to high- $Mg^{2+}$  conditions, several other proteins were identified as participants in the high- $Mg^{2+}$  response. Vacuolar-type H<sup>+</sup>-pyrophosphatase (AVP1) (Yang *et al.*, 2018), magnesium transporter 6 (MGT6) (Yan *et al.*, 2018), and *mid1*-complementing activity 1, 2 (MCA1/2) (Yamanaka *et al.*, 2010) are required for tolerance to high  $Mg^{2+}$  because their knock-out mutants were hypersensitive to high- $Mg^{2+}$  conditions. In contrast, knock-out mutants of cation exchanger 1 (CAX1) (Bradshaw, 2005; Cheng *et al.*, 2003) and nucleoredoxin 1 (NRX1) (Niu *et al.*, 2018) were more resistant to high  $Mg^{2+}$ . Interestingly, MCA1/2, CAX1 and NRX1 are involved in the regulation of cytosolic  $Ca^{2+}$  concentration, suggesting a link between calcium homeostasis and high  $Mg^{2+}$  tolerance. In addition, the involvement of ABA signalling in response to high magnesium conditions has been demonstrated. An increase in ABA content and expression of ABA biosynthetic genes was reported under high magnesium conditions (Guo *et al.*, 2014; Visscher *et al.*, 2010). Moreover, the ABA - insensitive mutant *abi1-1* was less sensitive to high magnesium treatment than WT (Guo *et al.*, 2014).

Recently, we discovered that phospholipase Dα1 activity is vital in the stress response to high-magnesium conditions in *Arabidopsis*. The T-DNA insertion mutant *plda1* was hypersensitive to elevated magnesium levels and showed reduced primary root length and fresh weight. PLDα1 activity increases rapidly following high- $Mg^{2+}$  treatment. Moreover, high- $Mg^{2+}$  treatment was shown to disrupt K<sup>+</sup> homeostasis.

Plant phospholipases D (PLD) cleave common phospholipids such as phosphatidylcholine releasing phosphatidic acid (PA) and free head group. PLDα1, the most abundant PLD member in *Arabidopsis*, has been reported to play a role in stress responses such as plant-microbe interaction, wounding, freezing, dehydration, and salinity (Hong *et al.*, 2016; Ruelland *et al.*, 2015; Wang *et al.*, 2014). The PA apparently serves as a key signalling molecule in the above responses (Pokotylo *et al.*, 2018).

83  
84 Leaf senescence is a normal manifestation of plant ageing and represents the final stage of its  
85 development. There is also senescence induced by environmental stresses such as drought,  
86 cold, heat, low light, and pathogen attack (Sade *et al.*, 2018; Zhang and Zhou, 2013), nutrient  
87 deficiencies such as nitrogen (Meng *et al.*, 2016), potassium (Cao *et al.*, 2006; Li *et al.*, 2012;  
88 Wang *et al.*, 2012), or magnesium (Tanoi and Kobayashi, 2015). Not only deficiency but also  
89 excess of nutrients leads to premature senescence of leaves. Exposure of sunflower plants to  
90 elevated  $K^+$  concentration resulted in premature leaf senescence (Santos, 2001). Ionic  
91 imbalance caused by salt stress also causes premature leaf senescence. The regulatory role of  
92 ROS (Allu *et al.*, 2014) and transcription factor ANAC092 (Balazadeh *et al.*, 2010) was revealed  
93 here. Interestingly, both ROS and ANAC092 are also involved in the regulation of  
94 developmental senescence. Thus, there is an overlap between stress-induced senescence and  
95 developmental senescence. In addition to ROS and specific transcription factors, the  
96 phytohormones jasmonic acid, ABA and cytokinins also play important roles in senescence  
97 processes.  
98  
99 This study shows that high external magnesium concentration triggers leaf senescence in  
100 Arabidopsis. Moreover, the knockout mutant of *PLD $\alpha$ 1* exhibits premature leaf senescence  
101 under high-Mg<sup>2+</sup> conditions compared with WT. Under high-Mg<sup>2+</sup> conditions, we also observed  
102 impaired ion homeostasis of *pld $\alpha$ 1*. Furthermore, hormone, starch, and proline accumulation  
103 were altered in *pld $\alpha$ 1* plants senescing under high Mg<sup>2+</sup>. From these results, we conclude that  
104 *PLD $\alpha$ 1* functions as a negative regulator of of high-Mg<sup>2+</sup> induced leaf senescence.

## 105 Materials and methods

### 106 Plant materials

107 *Arabidopsis thaliana* Col-0 was used in the study. Knockout line *pld $\alpha$ 1-1* (SALK\_067533) was  
108 obtained from the NASC. Complemented lines *pld $\alpha$ 1-1Com1* and *pld $\alpha$ 1-1Com2* were described  
109 previously (Kocourková *et al.*, 2020).

### 110 Plant cultivation

111 Phenotypic experiments were performed on agar plates and in hydroponics. On vertical agar  
112 plates, plants were grown for 10 days on ½ MS, 1% agar (Sigma) and then transplanted into  
113 either control plates (½ MS (Duchefa), 1% agar) or high-Mg<sup>2+</sup> plates (½ MS, 15 mM MgCl<sub>2</sub>, 1 %  
114 agar (Sigma)) and grown for another 7 days. Plates were kept in a growth chamber at 22 °C  
115 during the day, 21 °C at night, under long day (16 h of light) conditions at 100  $\mu\text{mol m}^{-2} \text{s}^{-1}$  of  
116 light. Hydroponic plant cultivation was described in Kocourkova *et al.* (2020). 24-day-old  
117 hydroponically cultivated plants were treated with either ½ Hoagland's solution (control) or ½  
118 Hoagland's solution with 15 mM MgSO<sub>4</sub> added. The plants were grown in a growth chamber at  
119 22 °C during the day (light intensity of 100  $\mu\text{mol m}^{-2} \text{s}^{-1}$ ) and 21 °C at night in a 10-hour day/14-  
120 hour night mode.

### 121 PLD $\alpha$ 1 activity

122 To determine *in vitro* activity, extracts from a mixed leaf sample from the 3<sup>rd</sup>, 4<sup>th</sup>, 5<sup>th</sup> and 6<sup>th</sup>  
123 oldest true leaves of the plant (= mixed leaf sample) were prepared from hydroponically grown  
124 plants treated with 0 or 15 mM MgSO<sub>4</sub> for 1, 2, 3, 4, 7 and 10 days. The leaves were frozen in  
125 liquid nitrogen. Samples were homogenized and buffer (per 1 mg sample 5  $\mu\text{l}$  buffer) consisting  
126 of 0.4 M sucrose, 0.1 M MgCl<sub>2</sub>, 0.1 M KCl, 50 mM HEPES-NaOH pH 7.5, Complete protease  
127 inhibitor cocktail (Roche) and Pierce Phosphatase Inhibitor Mini Tablets (Thermo Fisher

Scientific) was added to the homogenized samples. The samples were centrifuged for 10 min at 6010 g at 4 °C. The supernatant was transferred into a new tube and the samples were centrifuged for 90 min at 27400 g at 4 °C. The supernatant was collected and the protein concentration was measured using a Coomassie Plus Protein Assay (Thermo Scientific).

The enzymatic reaction 100µl contained 15 µl of sample (1µg /µl), 50 mM MES (pH 6.5, NaOH), 20 mM CaCl<sub>2</sub> and 25 µl of substrate solution. The substrate solution contained 4 µM fluorescent PC (BODIPY-PC, Invitrogen™ by Thermo Fisher Scientific), 25 µM 1,2-dipalmitoyl-*sn*-glycerol-3-phosphocholine (Avanti Polar Lipids), 0.015% sodium deoxycholate and 50 mM MES buffer (pH 6.5). The substrate solution was incubated at room temperature for 30 minutes and then sonicated for 10 minutes. The reaction was started by adding the substrate and run for 30 min at 25 °C with shaking at 500 rpm. Lipids were extracted according to (Krkova *et al.*, 2018). The lipids were separated first by the mobile phase methanol/chloroform/water/acetic acid (21/15/4/0.8) and after drying by the mobile phase chloroform/methanol/water (26/9/1). The plates were laser-scanned using Sapphire™ Biomolecular Imager (Azzure Biosystems) and evaluated using Azure Spot 2.2 software. The phosphatidic acid standard was prepared using commercial phospholipase D (Sigma Aldrich) (Pejchar *et al.*, 2010).

### Western blot analysis

Western blot analysis was performed as described previously (Kocourková *et al.*, 2020) with minor changes. Protein extracts were prepared as described above for TLC analysis. Proteins were separated on 10% SDS PAGE and transferred by wet blot overnight on a nitrocellulose membrane. PLDα1 protein was detected with anti-PLDα1/2 antibody (Agrisera) diluted 1: 2000 in 3% low fat milk in TBS-T. Goat anti-rabbit (Bethyl) in 5% low fat milk was used as a secondary antibody. Precision plus protein dual color standard (Biorad) was used and the position of the bands after blot transfer was marked on the membrane with a Western blot marker pen (Abcam). To control protein transfer, the membrane was stained with Novex reversible membrane protein stain (Invitrogen) according to the manufacturer's instructions.

### Chlorophyll content

Samples were frozen in liquid nitrogen and homogenized. Chlorophyll was extracted into ethanol. Samples with ethanol were heated to 65 °C, left overnight at 4 °C and centrifuged (10 000 g, 10 min). The absorbance of the extracts was measured at 649 nm and at 665 nm and the chlorophyll content was calculated according to (Ritchie, 2006) and expressed as mg per g fresh weight.

### Gene transcription analysis

Gene transcriptions were measured either in whole aboveground parts of plants grown on agar treated with 0 or 15 mM MgCl<sub>2</sub> for 7 days or in the mixed leave sample of plants grown hydroponically treated with 0 or 15 mM MgSO<sub>4</sub> for 3 days. Measurement of gene expression was done according to (Kocourková *et al.*, 2020) with minor changes. Briefly, RNA was isolated using the Spectrum Plant Total RNA Kit (Sigma-Aldrich) and genomic DNA removed using a Turbo DNA-free Kit (Applied Biosystems). Transcription was performed using the Transcriptor First Strand cDNA Synthesis Kit (Roche) with 0.5 µg RNA per reaction. Quantitative PCR was performed with a LightCycler 480 SYBR Green I Master Mix (Roche) on a LightCycler 480 System (Roche). The sequences of the primers used are listed in Table S2.

173

## 174 *Ion leakage*

175 Rosettes of plants grown on agar and treated with 0 or 15 mM  $\text{MgCl}_2$  for 7 days were  
176 immersed in deionized water. Electrolyte leakage was measured with a COND 70 portable  
177 Conductivity Meter after 1 hour of incubation at room temperature. The samples were then  
178 autoclaved and the total conductivity of the extract was measured. The results were expressed  
179 as a proportion of the total conductivity in %.

## 180 *Measurement of nutrient content*

181 Seedlings were grown for 10 d on half-strength MS media, after which they were transferred  
182 to agar plates with 0 or 15 mM  $\text{MgCl}_2$  for 7 d. Plates were kept in a growth chamber at 22°C  
183 during the day, 21°C at night, under long day (16 h of light) conditions at  $100 \mu\text{mol m}^{-2} \text{s}^{-1}$ .  
184 Samples (pooled plants, ~100 mg dry weight) were digested with  $\text{HNO}_3$ : HCl (6:1, v:v) and P,  
185  $\text{Mg}^{2+}$ ,  $\text{K}^+$ , and  $\text{Ca}^{2+}$  content was determined with inductively coupled plasma optical emission  
186 spectroscopy (Spectroblue, Spectro, Germany) analysis in the laboratory of Ekolab Žamberk,  
187 Czech Republic).

## 188 *Starch staining*

189 For starch staining the 10-day-old plants grown on agar plates treated for 3 days with 0 or 15  
190 mM  $\text{MgCl}_2$  and hydroponically grown 24-day-old plants treated for 3 days with 0 or 15 mM  
191  $\text{MgSO}_4$  were used. Plants were collected at the end of the dark period. Chlorophyll was  
192 removed by immersion in 80% hot ethanol. The ethanol was changed until the rosettes were  
193 completely discolored. The rosettes were washed with water and then stained for 10 minutes  
194 with Lugol solution (Sigma) and washed for 1 hour in water at room temperature. The plants  
195 were then scanned on a Scanner Epson Perfection V800 Photo (Epson).

## 196 *Phytohormone analysis*

197 Phytohormones were analyzed according to (Prerostova *et al.*, 2021). Briefly, samples (20-  
198 45 mg FW leaves) were homogenized and extracted with 100  $\mu\text{L}$  50% acetonitrile solution. The  
199 extracts were centrifuged at 4°C and 30,000g. The supernatants were applied to SPE Oasis HLB  
200 96-well column plates (10 mg/well; Waters, USA) and then eluted with 100  $\mu\text{L}$  50%  
201 acetonitrile. The pellets were then re-extracted. Phytohormones in each eluate were  
202 separated on Kinetex EVO C18 column (Phenomenex, USA). Hormone analysis was performed  
203 with a LC/MS system consisting of UHPLC 1290 Infinity II coupled to 6495 Triple Quadrupole  
204 Mass Spectrometer (Agilent, USA).

## 205 *Proline accumulation measurement*

206 Proline content was measured in the mixed leaf sample of plants grown hydroponically treated  
207 with 0 or 15 mM  $\text{MgSO}_4$  for 3, 4 and 7 days with ninhydrin method (Bates *et al.*, 1973). The  
208 samples were homogenized and proline was extracted into 3% sulfosalicylic acid (SSA, 5  $\mu\text{L}$ /mg  
209 fresh weight). The samples were centrifuged (5 min at maximum speed) and supernatant was  
210 collected. The reaction mixture (180  $\mu\text{L}$ ) consisted of 30  $\mu\text{L}$  sample, 96  $\mu\text{L}$  glacial acetic acid, 24  
211  $\mu\text{L}$  6 M orthophosphoric acid, 30  $\mu\text{L}$  3% SSA and 1.5 mg ninhydrin. The reaction was run for 1  
212 hour at 96 °C. Then the samples were cooled on ice and 300  $\mu\text{L}$  of toluene was added. The  
213 absorbance in the upper phase was measured at 520 nm.

## Results

### *PLDα1 activity and amount of PLDα1 increase in leaves of Mg<sup>2+</sup> treated plants*

We had previously reported that increased Mg<sup>2+</sup> concentration rapidly induces PLDα1 activity in Arabidopsis roots (Kocourkova *et al.*, 2020). Here, we monitored PLDα activity after Mg<sup>2+</sup> treatment in Arabidopsis leaves. 24-day-old hydroponically grown plants were treated with 15 mM MgSO<sub>4</sub> for 1 to 10 days. Leaves from control and treated plants were harvested, homogenised, and the enzyme activity of PLDα was determined *in vitro*. PLDα activity increased throughout the observation period (1-10 days) compared with the control (Fig. 1A, B). Higher PLDα1 activity compared with the control was observed after two days of treatment with 15 mM MgSO<sub>4</sub> (Fig. 1A, B) and increased 1.3-fold. The maximum activity was observed on the seventh day, when it increased almost 17-fold.

PLDs cleave common phospholipids such as phosphatidylcholine, releasing PA and the free head group, e.g. choline. PA is also the product of diacylglycerol kinase activity as well as the substrate for PA phosphatase, among other enzymes (Ruelland *et al.*, 2015). Therefore, the PA level does not necessarily correlate with PLD activity. Moreover, there are several isoforms of PLD in Arabidopsis that differ in their biochemical properties (Kolesnikov *et al.*, 2012). To measure PLD activity *in vitro*, we chose the optimal conditions for PLDα activity. PLDα activity was also determined in control and Mg<sup>2+</sup>-treated PLDα1 knockout plants (*plda1-1*). In *plda1-1*, no increase in PA level (PLDα activity) was observed under either control or high Mg<sup>2+</sup> conditions (Fig. S1). Thus, the activity of the PLDα1 isoform is responsible for the observed increase in PA level. The increase in PLDα1 activity may be due to activation of PLDα1 or a higher level of PLDα1 protein, or both. The amount of PLDα1 in the leaves of control and treated plants was examined by western blot using the anti-PLDα1,2 antibody. The results clearly show that the level of PLDα1 increases after Mg<sup>2+</sup> treatment (Fig. 1C, D). The difference between control and treated plants was detectable after three days of Mg<sup>2+</sup> treatment.

Determination of the activity and level of PLDα1 was performed in samples consisting of mature third, fourth, fifth, and sixth leaves. Senescence symptoms were slightly visible in these leaves on the seventh day. However, the same trend, increased activity of PLDα1, was observed in the young leaves (7th -10th), which showed no visible signs of senescence (Fig. S2). Therefore, we hypothesise that changes in PLDα1 activity and content are not downstream of the manifestation of leaf senescence.

These results show that both PLDα1 activity and PLDα1 levels increase in Arabidopsis leaves after treatment with Mg<sup>2+</sup>.

### *High magnesium induces premature leaf senescence in plda1*

We found (Kocourkova *et al.*, (2020) that 12-day-old Arabidopsis seedlings of *plda1* under high-Mg<sup>2+</sup> conditions had shorter primary and lateral roots and lower fresh weight. Here, we noticed higher yellowing or yellow spots on *plda1-1* leaves after Mg<sup>2+</sup> treatment (15 Mm MgSO<sub>4</sub>) of 24-day-old plants (Fig. 2A, B). Also, the fresh weight of *plda1-1* rosettes was less than half compared with WT, and the chlorophyll content of *plda1-1* decreased by about 35% compared with WT (Fig. 2C, D). This indicates premature leaf senescence of *plda1-1* plants.

To further characterise the observed phenomenon, we additionally monitored high-Mg<sup>2+</sup>-induced senescence by determining the expression of senescence genes and measuring ion leakage as a marker of membrane damage. To verify that the observed premature senescence

was exclusively related to PLD $\alpha$ 1, we also included two *plda1-1* complemented (*plda1-1*Com1 and Com2) lines (Kocourková *et al.*, 2020). As in the adult plants, the fresh weight of *plda1-1* rosettes was significantly lower (36%) compared with the WT and complemented lines (Fig. 2F). Expressions of Senescence-Associated Genes 13 (SAG13, At2g29350) and the transcription factor ANAC092/NAC2/ORE1 (At5g39610) are commonly used as markers of senescence (Balazadeh *et al.*, 2010; Bresson *et al.*, 2018). Expressions of these genes were higher in all Mg<sup>2+</sup>-treated WT, *plda1-1* and complemented plants in comparison with untreated controls. Hence, high-Mg<sup>2+</sup> induced transcriptional changes accompanying leaf senescence in all studied genotypes. Moreover, in *plda1-1* plants, SAG13 and ANAC092 expression was notably higher than in WT or complemented lines. Expression of SAG13 was approximately 2000-fold higher in *plda1-1* seedlings treated with high Mg<sup>2+</sup> than in the untreated control, whereas for WT the increase was only 314-fold higher than in the untreated control (Fig. 2G). Similarly, the expression of ANAC092 was increased 12-fold in *plda1-1*, whereas it increased only 2-fold in WT (Fig. 2H). Membrane damage was estimated by measuring ion leakage. After Mg<sup>2+</sup> treatment, ion leakage reached 7.7% in *plda1-1*, while it was only 3% in WT.

These results demonstrate that high-Mg<sup>2+</sup> treatment induces premature leaf senescence and that *plda1-1* plants reveal significantly higher premature leaf senescence in comparison to WT. Premature senescence after high-Mg<sup>2+</sup> treatment was observed in both ten-day-old seedling and three-week-old mature plants. Thus, we hypothesise that PLD $\alpha$ 1 acts as negative regulator of high-Mg<sup>2+</sup> induced leaf senescence.

### *Levels of plant hormones are altered in high-Mg<sup>2+</sup> conditions*

Plant hormones are one of the key components involved in the processes of leaf senescence, influencing all stages, initiation, progression and terminal phase, of leaf senescence (Lim *et al.*, 2007). Additionally, Guo *et al.* (2014) reported increase level of abscisic acid (ABA) in response of Arabidopsis Landsberg erecta to high-Mg<sup>2+</sup> conditions. Hence, we measured range of phytohormones in WT and *plda1-1* in control and high-Mg<sup>2+</sup> conditions after two days of high-Mg<sup>2+</sup> treatment (Table S1). Principal component analysis of all measured shoot phytohormones showed a clear separation on the PC1 axis of both control and high-Mg<sup>2+</sup> conditions and genotypes (WT vs *plda1-1*). There was also a separation on the PC2 axis between WT and *plda1-1* genotype in high-Mg<sup>2+</sup> conditions (Fig. 3A). These results demonstrate robust hormonal response to high-Mg<sup>2+</sup> conditions in WT as well as involvement of PLD $\alpha$ 1 in this hormonal response.

In WT, the highly active cytokinin (CK) trans-zeatin (tZ) and its riboside (tZR) lowered after Mg<sup>2+</sup> treatment. Also, the content of the precursor trans-zeatin riboside monophosphate (tZRMP) lowered in high Mg<sup>2+</sup> treated shoots. On the opposite, the levels of the stress-related CKs cis-zeatin (cZ), its riboside (cZR), and phosphate (cZRMP) increased after high Mg<sup>2+</sup> treatment in WT.

The high-Mg<sup>2+</sup> treatment up-regulated the production of auxin indole-3-acetic acid (IAA) in WT plants. The level of IAA precursor, indole-3-acetamide (IAM) increased under the same conditions as well. Also, deactivation of production of IAA irreversible amino acid conjugate, IAA-glutamate significantly decreased after high Mg<sup>2+</sup> treatment in WT.

ABA and its catabolites phaseic acid and 9-hydroxy-abscisic acid (9OH-ABA) elevated about three times in WT shoot of high-Mg<sup>2+</sup> treated plants in comparison with non-treated plants.

Jasmonic acid (JA) was greatly up-regulated (about 17 times) in high-Mg<sup>2+</sup> conditions. Similarly, levels of JA precursor, cis-12-oxo-phytodienoic acid (cisOPDA) and JA metabolites, jasmonic acid methyl ester (JA-Me) and dinor-12-oxo-phytodienoic acid (dinorOPDA) significantly increased. Great increase of shoot salicylic acid (SA) level was detected in high-Mg<sup>2+</sup> treated WT plants as well.

Under control conditions, no significant differences were found between WT and *plda1-1* in the levels of all hormones measured, except for tZR. Under high-Mg<sup>2+</sup> conditions, changes of some of the hormones differed between WT and *plda1-1* (Fig. 3B, Table S1). Increase of SA was the same in WT and *plda1-1*. Also, the increase of IAA was the same in WT and *plda1-1*. However, higher increase was observed in the levels of both IAA precursor, IAM and IAA metabolite oxo-IAA-glucose ester (OxIAA-GE). Increase of JA (but not its precursor or metabolites) was significantly higher in *plda1-1* in comparison with WT (Fig. 3A, Table S1). Increase of ABA as well as its catabolites phaseic acid and 9OH-ABA was more pronounced in *plda1-1* than in WT. Interestingly, increase of cZ detected after Mg<sup>2+</sup> treatment in WT was not observed in *plda1-1*.

These results revealed that high-Mg<sup>2+</sup> condition induce range of hormonal changes in both WT and *plda1-1* plants. However, changes in ABA and JA levels observed after treatment of plants with high-Mg<sup>2+</sup> were more pronounced in *plda1-1* plants. Thus, it suggests that those hormonal changes are, at least partly, under the control of PLDα1. It means that the function of PLDα1 in regulation of hormonal changes after high-Mg<sup>2+</sup> treatment is specific, as the observed difference between WT and *plda1-1* did not affect all hormones that changed after high-Mg<sup>2+</sup> treatment of plants but only ABA, JA and cis-zeatin.

### *Ion homeostasis and levels of starch and proline are altered in plda1-1 under high-Mg<sup>2+</sup> conditions*

In our previous work, an imbalance of K<sup>+</sup> and Mg<sup>2+</sup> was found in the seedlings of *plda1-1* treated with high-Mg<sup>2+</sup>. They contained less Mg<sup>2+</sup> and K<sup>+</sup> under high-Mg<sup>2+</sup> conditions (Kocourková *et al.*, 2020). To reveal whether a similar ion imbalance also occurs in high-Mg<sup>2+</sup>-treated shoots, we measured Mg<sup>2+</sup>, Ca<sup>2+</sup>, K<sup>+</sup> and P in WT and *plda1-1* shoots under control and high-Mg<sup>2+</sup> conditions.

After high-Mg<sup>2+</sup> treatment (15 mM), Mg<sup>2+</sup> content was increased approximately fivefold in WT leaves. However, *plda1-1* showed significantly lower Mg<sup>2+</sup> content than WT (Fig. 4A). Shoot K<sup>+</sup> content was lower in high-Mg<sup>2+</sup>-treated plants, and *plda1-1* plants contained even less K<sup>+</sup> than WT (Fig. 4B). Ca<sup>2+</sup> content was lower in high-Mg<sup>2+</sup>-treated plants, but WT and *plda1-1* content did not differ (Fig. 4C). Furthermore, Niu *et al.* (2015) showed that the addition of phosphorus to high-Mg<sup>2+</sup> media resulted in an increase in Arabidopsis root growth and, conversely, the addition of high-Mg<sup>2+</sup> to low-P media worsened root growth. Based on these results, the authors speculated that the exacerbation of the effects of low P in the presence of high Mg<sup>2+</sup> was due to the increase in the severity of P deficiency. Therefore, we also measured P content in WT and *plda1-1* grown on high Mg<sup>2+</sup> media. Remarkably, the phosphorus content in *plda1-1* shoots under high-Mg<sup>2+</sup> conditions was significantly lower than in WT (Fig. 4D).

These results were supported by determining the expression of genes known to be associated with ion homeostasis. CBL1 is involved in potassium as well as phosphate homeostasis, whereas CIPK23 is thought to be involved in both magnesium and potassium homeostasis (Gao *et al.*, 2020; Ragel *et al.*, 2015; Sánchez-Barrena *et al.*, 2020; Tang *et al.*, 2015). In WT leaves, the expression of these genes was slightly up-regulated under high-Mg<sup>2+</sup> conditions (Fig. 4E, F). However, in *plda1-1* leaves treated with high Mg<sup>2+</sup>, CIPK23 and CBL1 transcripts were significantly higher than in WT plants.

Proline is well known stress molecule involved mainly in responses to drought and salt stress. Increase of proline content was also reported as response to phosphate starvation in Arabidopsis (Aleksza *et al.*, 2017). As we observed decrease of phosphate content in high-Mg<sup>2+</sup> treated *plda1-1* plants we monitor proline level in high-Mg<sup>2+</sup> treated WT and *plda1-1* leaves. Proline content substantially increased with increasing time of Mg<sup>2+</sup> treatment and was tenfold



higher in WT plants treated for seven days with high  $Mg^{2+}$  than in control plants. Interestingly, shoots of *plda1-1* contained significantly lower level of proline after  $Mg^{2+}$  treatment in comparison with WT (Fig. 4G).

It has been reported that that high- $Mg^{2+}$  treatment disturbs starch homeostasis (Guo 2014-citace) and that both potassium and phosphorus deficiency lead to accumulation of leaf starch (Hermans *et al.*, 2006; Hu *et al.*, 2017). We stained starch with Lugol's solution in WT and *plda1-1* seedlings and 24-day-old plants grown under control and high- $Mg^{2+}$  conditions. At the end of dark period, there was clearly a higher starch accumulation in the shoot after  $Mg^{2+}$  treatment (Fig. 4H, I). Interestingly, higher starch accumulation was observed in *plda1-1* compared with WT plants. Moreover, shoot expression of  $\beta$ -amylases *BAM1* and *BAM2* was impaired in *plda1-1* compared with WT under high  $Mg^{2+}$  treatment (Fig. 4J, K).

These results demonstrate that  $Mg^{2+}$ ,  $K^+$ , and P homeostasis, starch metabolism and proline accumulation are altered in *plda1-1* shoots of Arabidopsis seedlings grown under high- $Mg^{2+}$  conditions.

## Discussion

In our previous work (Kocourková *et al.*, 2020) we found that *plda1* plants have shorter roots under high  $Mg^{2+}$  conditions compared to WT. We also showed that PLD $\alpha$ 1 activity contributes significantly to tolerance to high  $Mg^{2+}$ . In this work, we focused on the shoots. Our original hypothesis was that PLD $\alpha$ 1 activity is important mainly in roots, as they are exposed to high  $Mg^{2+}$  conditions and an increase in PLD activity is rapidly induced after high  $Mg^{2+}$  treatment (Kocourková *et al.*, 2020). However, we found that PLD $\alpha$ 1 activity in the aerial parts of WT Arabidopsis also increased after treatment of the plants with high level of  $Mg^{2+}$  ions. Using western blots, we also showed that the amount of PLD $\alpha$ 1 increased in shoots treated with high  $Mg^{2+}$  and that *plda1* plants exhibited premature leaf senescence under high  $Mg^{2+}$  conditions. Thus, PLD $\alpha$ 1 appears to act as a negative regulator of senescence induced by high  $Mg^{2+}$ .

### Magnesium-induced senescence

Leaf senescence is a highly coordinated process. In addition to age-dependent senescence, there is also stress-induced senescence caused by abiotic (drought, salt, high or low temperature, and nutrient imbalance) and biotic stresses (Guo *et al.*, 2021; Sade *et al.*, 2018). Leaf senescence is associated with membrane and chlorophyll degradation. Leaf yellowing and senescence have been reported to be induced by magnesium deficiency (for a review, see (Tanoi and Kobayashi, 2015). In addition, a decrease in chlorophyll content was observed by Yan *et al.* (2018) under conditions of  $Mg^{2+}$  imbalance ( $Mg$  deficiency and excess). We observed a greater decrease in leaf chlorophyll content and higher ion leakage in *plda1* plants than in WT. Also, the transcript level of the senescence marker genes *SAG13* (Dhar *et al.*, 2020) and *ANAC092* (John *et al.*, 2001; Miller *et al.*, 1999; Weaver *et al.*, 1998) was significantly higher in *plda1* plants, although the expression of both genes was also increased in WT plants in which no signs of senescence were yet evident. Since both genes are among the markers of the onset of senescence, it can be concluded that senescence processes are also initiated in WT upon high  $Mg^{2+}$  treatment. However, plants with dead PLD $\alpha$ 1 tolerate the stress caused by high  $Mg^{2+}$  concentrations much worse than WT, leading to apparent premature leaf senescence.

### The high $Mg^{2+}$ induced senescence-associated hormonal changes

Hormones play a critical role in regulating both development and stress-induced senescence. Cytokinins (CK), auxin and gibberellic acid (GA) delay leaf senescence, while abscisic acid (ABA), salicylic acid (SA), jasmonic acid (JA), ethylene and strigolactones (SL) promote leaf senescence

(Guo *et al.*, 2021; Lim *et al.*, 2007). The overall hormonal changes we observed after high  $Mg^{2+}$  treatment of WT plants were in good agreement with the reported hormonal changes during leaf senescence. We found that after two days of high  $Mg^{2+}$  treatment, there was a decrease in active cytokinins, such as *trans*-zeatin (tZ) and its riboside (tZR) which is in line with gradual decrease in cytokinin content observed during leaf senescence (Gan and Amasino, 1996; Singh *et al.*, 1992). On the other hand, the content of the stress-related CKs *cis*-zeatin (cZ), its riboside (cZR), and phosphate (cZRMP) increased. An increase in cZ during natural senescence was reported in Arabidopsis and tobacco (Gajdošová *et al.*, 2011; Uzelac *et al.*, 2016). The level of cZ differed in WT and *pldα1* plants under high  $Mg^{2+}$  conditions. This suggests that the level of cZ is regulated by PLDα1 under high  $Mg^{2+}$  conditions. However, the level of cZ in more senescent *pldα1* plants is lower compared with WT. This is a counterintuitive finding, and further studies are required to clarify this phenomenon.

Auxin seems to play a complex role in senescence. On the one hand, its level and the level of auxin-related biosynthetic genes increase during natural leaf senescence (Lim *et al.*, 2007). On the other hand, increased IAA level is associated with delayed dark-induced senescence (Kim *et al.*, 2011). In our experiments, the level of free IAA increased significantly in WT and *pldα1* plants treated with high  $Mg^{2+}$ , but we found no difference between genotypes, indicating that the observed phenotypic changes do not appear to be related to auxin content.

In our experiment, a significant increase in salicylic acid (SA) was observed after only two days of high  $Mg^{2+}$  treatment. Salicylic acid is a hormone well described in the mechanism of response to biotic stress, but it is also associated with responses to abiotic stress (Miura and Tada, 2014). Moreover, the level of SA increases progressively during leaf senescence (Breeze *et al.*, 2011; Zhang *et al.*, 2017), and SA plays a direct role in both the onset and progression of leaf senescence (Guo *et al.*, 2021).

Absciscic acid (ABA) is a plant hormone whose level increases significantly after abiotic stresses such as drought and salt stress. During leaf senescence, the level of ABA increases, and exogenous application of ABA induces leaf senescence (Lim *et al.*, 2007; Zhang *et al.*, 2012a). We also observed a significant increase in ABA level after high  $Mg^{2+}$  treatment in WT and *pldα1* plants, while the increase of ABA was higher in *pldα1* plants than in WT plants. This is consistent with the higher senescence of *pldα1* induced by high  $Mg^{2+}$  content, which is also consistent with the observations of Guo *et al.* (2014). The authors found an increase in ABA content after long-term (14 d) exposure of Arabidopsis to high  $Mg^{2+}$ . They also showed that ABA insensitive plants *abi1-1* were less sensitive to high  $Mg^{2+}$  treatment. In our experiments, a significant ABA response was observed after only 48 h of exposure. Moreover, transcriptome analysis of Arabidopsis roots treated with high  $Mg^{2+}$  revealed increased expression of 9-cis-epoxycarotenoid dioxygenase, an enzyme associated with the biosynthesis of ABA, after 45 min of high  $Mg^{2+}$  treatment (Visscher *et al.*, 2010). All these results suggest that the increase in ABA content and subsequent ABA signalling are involved in the PLDα1-mediated early responses to high  $Mg^{2+}$  conditions.

Like SA, jasmonic acid (JA) is a hormone known primarily for its involvement in plant defence mechanisms against pathogens. However, it is also associated with many responses to abiotic stresses, such as salt, heat, or drought stress (Raza *et al.*, 2020). It has been shown that JA content increases during both natural and induced leaf senescence, and external application of JA induces leaf senescence (He *et al.*, 2002; Seltsmann *et al.*, 2010), so JA plays a positive role in leaf senescence. However, plants with impaired JA biosynthesis showed normal leaf senescence (Seltsmann *et al.*, 2010), suggesting that JA is not directly involved in the regulation of leaf senescence. In our experiments, a significant increase in JA was observed in both WT and *pldα1* plants after high  $Mg^{2+}$  treatment, and this increase was more pronounced in *pldα1* plants.

JA signalling has been shown to play a role in the biosynthesis of camalexin (Pangesti *et al.*, 2016), a phytoalexin with a described role in the defence response to a variety of pathogens. Its biosynthesis is also induced by some abiotic treatments such as ROS-inducing compound

acifluorfen (Zhao *et al.*, 1998) or UV-B irradiation (Mert-Turk *et al.*, 2003). Interestingly, camalexin content increased after high  $Mg^{2+}$  treatment in WT and even more (by 4.5-fold) in *plda1* plants (Table S1). It is not clear what role camalexin might play in response to high  $Mg^{2+}$  treatment. However, higher camalexin levels in *plda1* plants might be related to higher JA levels in *plda1* plants treated with high  $Mg^{2+}$ . In addition, camalexin biosynthesis is regulated by MPK6 kinase, which has been shown to be a PA binding protein (Yu *et al.*, 2010).

#### Ion imbalance, starch and proline content and their role in senescence

We found changes in ion content in seedlings (Kocourková *et al.*, 2020) and leaves (this work) of plants treated with high  $Mg^{2+}$ . At WT, the  $K^+$  content of plants treated with high  $Mg^{2+}$  was lower compared to untreated controls. Moreover,  $K^+$  content under high  $Mg^{2+}$  conditions was significantly lower in *plda1* plants than in WT. Similarly, *plda1* and WT plants also differed in P content under high- $Mg^{2+}$  conditions; *plda1* plants had lower P contents than WT. However, the P content of WT did not differ between control and high- $Mg^{2+}$  conditions.

Potassium deficiency has been reported to induce leaf senescence in Arabidopsis and cotton. Interestingly, there is also strong evidence that jasmonic acid is involved in potassium deficiency - induced leaf senescence (Armengaud *et al.*, 2004; Cao *et al.*, 2006; Hu *et al.*, 2016; Li *et al.*, 2012). We demonstrated an increase in JA level after high  $Mg^{2+}$  treatment in both WT and *plda1*, and that the accumulation of JA in *plda1* was higher than that of WT. Further experiments are needed to determine whether potassium deficiency, JA accumulation, and leaf senescence are related.

Leaf starch is synthesised during the day and mobilised during the following night to provide a steady supply of carbon and energy. Starch also mediates plant responses to abiotic stresses such as water deficit, high salinity or extreme temperatures. Most studies considered that starch content in leaves decreases in response to abiotic stresses. However, there are also reports that starch accumulation increases in Arabidopsis under stress (Kaplan and Guy, 2004; Skirycz *et al.*, 2009). In our work, we observed increased starch accumulation under high  $Mg^{2+}$  conditions in WT plants, and starch accumulation was even higher under these conditions in *plda1* plants. The opposite effect of high  $Mg^{2+}$  was observed by Guo *et al.* (2014). The authors found lower leaf starch level in Arabidopsis WT under high  $Mg^{2+}$  conditions than under control conditions. It is not clear why such different results occurred. One possible explanation could be the use of different ecotypes and experimental conditions. Guo *et al.* (2014) used an ecotype (Landsberg erecta), a higher  $Mg^{2+}$  concentration (32 mM) and long-term high  $Mg^{2+}$  stress, while we observed starch in leaves on the third day after treating Arabidopsis plants of ecotype Columbia 0 with 15 mM  $Mg^{2+}$ . The relationship between high starch accumulation and leaf senescence has also been described (Huang *et al.*, 2018; Oda-Yamamizo *et al.*, 2016; Schaffer *et al.*, 1991; Xiao *et al.*, 2020). A possible link between PLD $\alpha$ 1 and altered starch accumulation could be the PA binding protein glyceraldehyde-3-phosphate dehydrogenase (GAPDH) (McLoughlin *et al.*, 2013), as seedlings with genetically reduced GAPDH activity accumulated higher amounts of starch compared to WT (Yang *et al.*, 2015). Moreover, phosphorus deficiency increases leaf sugars and starch content (Cakmak *et al.*, 1994; Hermans *et al.*, 2006) and we found lower phosphorus content in the leaves of *plda1* plants compared to WT.

We observed proline accumulation in plants exposed to high  $Mg^{2+}$  conditions. Proline is a well-known molecule involved in adaptation to stress by e.g. balancing cellular redox potential, scavenging free radicals and stabilising subcellular structures (Kaur and Asthir, 2015; Szabados and Savoure, 2009). A relationship between proline metabolism and leaf senescence has been previously noted and discussed (Zhang and Becker, 2015). Proline content significantly increased in detached rice leaves during senescence (Wang *et al.*, 1982). On the other hand,

proline catabolism appears to be up-regulated in Arabidopsis during natural leaf senescence (Funck *et al.*, 2010). Moreover, experiments with inhibition of PLD activity by 1-butanol during salt stress showed that PLD appears to be a negative regulator of the delta-1-pyrroline-5-carboxylate synthase 1 gene, which controls proline biosynthesis (Thiery *et al.*, 2004). We have demonstrated that exposure of *pldα1* to high  $Mg^{2+}$  resulted in decreased proline accumulation compared to WT. Thus, PLDα1 appears to be a positive regulator of proline synthesis. Why PLDα1-depleted plants have less proline under high- $Mg^{2+}$  conditions is unclear. The difference in proline content between WT and *pldα1* is significant only after prolonged exposure (4 days) to high  $Mg^{2+}$ , and it is therefore possible that this is a side effect of earlier changes caused by high  $Mg^{2+}$  rather than a direct regulation of proline metabolism by PLDα1. However, it is possible that proline helps the plants to cope with the stress caused by high  $Mg^{2+}$ , and the lower proline content of *pldα1* may contribute to the manifestation of senescence in plants with dysfunctional PLDα1. Interestingly, significant differences in proline content were observed between WT and phosphoenolpyruvate carboxylase 3 (PEPC3) knockout in Arabidopsis under control and salt stress conditions and PEPC3 was identified as the PA-binding protein (Testerink *et al.*, 2004).

#### Mechanism of PLDα1 involvement in leaf senescence

PLDα1 has been described to be involved in a variety of biological processes. PLDα1 knockout or antisense-suppressed plants show alterations in water loss, reactive oxygen species production (ROS), response to abscisic acid (ABA) and stomatal movement (Zhang *et al.*, 2004; Zhang *et al.*, 2009); Mishra, 2006 #9472}, salt stress (Bargmann *et al.*, 2009; Yu *et al.*, 2015; Yu *et al.*, 2010), freezing sensitivity (Rajashekar *et al.*, 2006) and seed aging (Devaiah *et al.*, 2007). The involvement of PLDα1 in senescence has also been documented. In 1997, Fan *et al.* (Fan *et al.*) observed that treatment of detached leaves with abscisic acid and ethylene led to accelerated senescence and increased level of PLDα mRNA, protein and activity. Using the PLDα antisense construct, they then prepared plants with reduced PLDα1 expression. Suppression of PLDα had no effect on natural plant growth and development. Even in the absence of abscisic acid and ethylene, the detached leaves of the PLDα-deficient and WT plants showed similar rate of senescence.

However, the senescence rate of detached leaves of transgenic plants treated with ABA or ethylene was slower than that of detached leaves from WT. Later, Jia *et al.* (2013) showed that the application of n-butanol, an inhibitor of PLD, and N-acyl ethanolamine (NAE) 12:0, a specific inhibitor of PLDα1, delayed ABA-promoted senescence to different extents. Phospholipase Dδ (PLDδ) was also induced in detached leaves treated with ABA, and suppression of PLDδ delayed ABA and ethylene - promoted senescence in Arabidopsis (Jia and Li, 2015). These data suggest that suppression of both PLDα1 and PLDδ blocks membrane lipid degradation, which ultimately delays ABA-promoted senescence. Thus, PLDα1 and PLDδ appear to be important mediators that play a positive role in phytohormone-promoted senescence in detached leaves. However, in this work, we showed that PLDα1 likely serves as a negative regulator of senescence. We observed that PLDα1 activity and PLDα1 abundance increase during senescence triggered by high  $Mg^{2+}$  content. An increase in PLDα1 expression has also been described during age-related leaf senescence (Xiao *et al.*, 2010). However, in our case, the increase in PLDα1 activity and PLDα1 abundance is probably not related to the increased membrane degradation described above, because *pldα1-1* plants exhibited significantly higher senescence compared with WT. Therefore, another regulatory mechanism by which PLDα1 is involved in the regulation of senescence induced by high  $Mg^{2+}$  levels must play a role.

In general, there are two molecular ways by which PLDα1 may regulate other events. The first is linked with PLDα1 activity which leads to the production of the second messenger phosphatidic acid and free head group, and the second is protein-protein interaction. In the

case of PLD $\alpha$ 1, both scenarios have been documented. A combination of both mechanisms is also possible and has been described in the case of PLD $\alpha$ 1 involvement in ABA responses (see below). PLD-derived phosphatidic acid is produced in response to various biotic and abiotic stresses such as plant defence, wounding, salt, drought, cold, and heat stress (Yao and Xue, 2018). In salt stress induced PLD $\alpha$ 1 produces PA, which stimulates mitogen-activated protein kinase 6 (MPK6) to regulate the MAPK cascade (Yu *et al.*, 2010). PA also influences microtubule stabilisation by interacting with MAP65-1 during the Arabidopsis salt stress response (Zhang *et al.*, 2012b). In addition, ABA, part of the salt stress response, activates PLD $\alpha$ 1. PA subsequently binds to ABI1, a protein phosphatase 2C, a negative regulator of the ABA response. Binding of PA decreases the phosphatase activity of ABI1. Thus, PA, which is produced by PLD $\alpha$ 1, inhibits the function of the negative regulator ABI1 and thereby promotes the signalling of ABA (Zhang *et al.*, 2004). Since ABA functions as a positive regulator of leaf senescence, PLD $\alpha$ 1 could also play the role of a positive regulator of leaf senescence. However, in our study, this is not the case because PLD $\alpha$ 1 is a negative regulator of leaf senescence induced by high Mg<sup>2+</sup> content. PLD $\alpha$ 1 also plays a role in ABA-induced stomatal closure. It has been shown that PA, which was produced by PLD $\alpha$ 1, binds to the NADPH oxidase RbohD (respiratory burst oxidase homolog D) and RbohF of Arabidopsis and that this binding stimulates NADPH oxidase activity and thus the production of ROS in guard cells (Zhang *et al.*, 2009).

A number of PA-binding proteins have been found (Yao and Xue, 2018). CTR1 (CONSTITUTIVE TRIPLE RESPONSE1) is another example of PA binding protein (Testerink *et al.*, 2004; Testerink *et al.*, 2007). CTR1 is a Ser/Thr protein kinase that functions as a negative regulator of ethylene signalling. Loss of CTR1 function has been shown to promote the senescence process upon dark treatment, suggesting that CTR1 plays a role as a negative regulator of leaf senescence (Li *et al.*, 2017). We did not measure ethylene levels in our experimental setup. However, ethylene is known to be an endogenous modulator of senescence, including leaf senescence.

PLD $\alpha$ 1 protein interaction, the second possible PLD $\alpha$ 1 regulatory mechanism, is also involved in the regulation of ABA responses. PLD $\alpha$ 1 interacts with components of heterotrimeric G protein signalling, GPA1 (G $\alpha$ ) and G $\beta$  proteins (Gookin and Assmann, 2014; Zhao and Wang, 2004). The interaction of PLD $\alpha$ 1 with GPA1 stimulates the GTPase activity of GPA1 (Zhao and Wang, 2004). PLD $\alpha$ 1 also interacts with RGS1 protein (regulator of G protein signalling). RGS1 likely inhibits the GAP activity of PLD $\alpha$ 1 (Choudhury and Pandey, 2016). To further impact the specificity of this pathway, PA, the product of PLD $\alpha$ 1 activity, binds to RGS1 and inhibits its GAP activity. Interestingly, GPA1-, G $\beta$ - as well as RGS1 knock-out plants showed altered salt stress-induced senescence (Colaneri *et al.*, 2014).

In summary, high Mg<sup>2+</sup> induces leaf senescence and many of the physiological changes associated with leaf senescence induced by high Mg<sup>2+</sup> are under the control of PLD $\alpha$ 1. Subsequent studies should elucidate the precise molecular mechanism of this PLD $\alpha$ 1 control.

## Supplementary data

Fig. S1. PA amount increases in response to high-Mg<sup>2+</sup> stress in wt but not in *pld $\alpha$ 1-1*.

Fig. S2. Phospholipase D $\alpha$ 1 amount and activity increases in response to high Mg<sup>2+</sup> stress in youngest leaves

Table S1: Hormone analysis

Table S2: List of primers

## Acknowledgements

This research was supported by the Czech Science Foundation (grant No. 17-00522S) and the Ministry of Education, Youth and Sports of the Czech Republic (European Regional

613 Development Fund-Project ‘Centre for Experimental Plant Biology’ no.  
614 CZ.02.1.01/0.0/0.0/16\_019/0000738). The authors wish to thank Kateřina Vltavská for  
615 excellent technical assistance.

## 616 Author Contributions

617 DK and JM designed the study and wrote the manuscript. DK, KK, TP, and MD performed the  
618 experiments. All authors reviewed and edited the manuscript.

## 619 References

- Aleksza D, Horváth GV, Sándor G, Szabados L.** 2017. Proline accumulation is regulated by transcription factors associated with phosphate starvation. *Plant Physiology* **175**, 555-567.
- Allu AD, Soja AM, Wu A, Szymanski J, Balazadeh S.** 2014. Salt stress and senescence: identification of cross-talk regulatory components. *Journal of Experimental Botany* **65**, 3993-4008.
- Armengaud P, Breitling R, Amtmann A.** 2004. The potassium-dependent transcriptome of *Arabidopsis* reveals a prominent role of jasmonic acid in nutrient signaling. *Plant Physiology* **136**, 2556-2576.
- Balazadeh S, Siddiqui H, Allu AD, Matallana-Ramirez LP, Caldana C, Mehrnia M, Zanol MI, Kohler B, Mueller-Roeber B.** 2010. A gene regulatory network controlled by the NAC transcription factor ANAC092/AtNAC2/ORE1 during salt-promoted senescence. *Plant Journal* **62**, 250-264.
- Bargmann BOR, Laxalt AM, ter Riet B, van Schooten B, Merquiol E, Testerink C, Haring MA, Bartels D, Munnik T.** 2009. Multiple PLDs required for high salinity and water deficit tolerance in plants. *Plant and Cell Physiology* **50**, 78-89.
- Bates LS, Waldren RP, Teare ID.** 1973. Rapid determination of free proline for water-stress studies. *Plant and Soil* **39**, 205-207.
- Bradshaw HD, Jr.** 2005. Mutations in CAX1 produce phenotypes characteristic of plants tolerant to serpentine soils. *New Phytologist* **167**, 81-88.
- Breeze E, Harrison E, McHattie S, Hughes L, Hickman R, Hill C, Kiddle S, Kim YS, Penfold CA, Jenkins D, Zhang C, Morris K, Jenner C, Jackson S, Thomas B, Tabrett A, Legaie R, Moore JD, Wild DL, Ott S, Rand D, Beynon J, Denby K, Mead A, Buchanan-Wollaston V.** 2011. High-resolution temporal profiling of transcripts during *Arabidopsis* leaf senescence reveals a distinct chronology of processes and regulation. *Plant Cell* **23**, 873-894.
- Bresson J, Bieker S, Riester L, Doll J, Zentgraf U.** 2018. A guideline for leaf senescence analyses: from quantification to physiological and molecular investigations. *Journal of Experimental Botany* **12**, 769 - 786.
- Cakmak I, Hengeler C, Marschner H.** 1994. Partitioning of shoot and root dry matter and carbohydrates in bean plants suffering from phosphorus, potassium and magnesium deficiency. *Journal of Experimental Botany* **45**, 1245-1250.
- Cao SQ, Su L, Fang YJ.** 2006. Evidence for involvement of jasmonic acid in the induction of leaf senescence by potassium deficiency in *Arabidopsis*. *Canadian Journal Of Botany-Revue Canadienne De Botanique* **84**, 328-333.
- Colaneri AC, Tunc-Ozdemir M, Huang JP, Jones AM.** 2014. Growth attenuation under saline stress is mediated by the heterotrimeric G protein complex. *BMC Plant Biology* **14**, 129.
- Devaiah SP, Pan XQ, Hong YY, Roth M, Welti R, Wang XM.** 2007. Enhancing seed quality and viability by suppressing phospholipase D in *Arabidopsis*. *Plant Journal* **50**, 950-957.
- Dhar N, Caruana J, Erdem I, Subbarao KV, Klosterman SJ, Raina R.** 2020. The *Arabidopsis* *SENESCENCE-ASSOCIATED GENE 13* regulates dark-induced senescence and plays contrasting roles in defense against bacterial and fungal pathogens. *Molecular Plant-Microbe Interactions* **33**, 754-766.

- Fan L, Zheng S, Wang X.** 1997. Antisense suppression of phospholipase D delays abscisic acid- and ethylene-promoted senescence of postharvest *Arabidopsis* leaves. *Plant Cell* **9**, 2183-2196.
- Funck D, Eckard S, Müller G.** 2010. Non-redundant functions of two proline dehydrogenase isoforms in *Arabidopsis*. *BMC Plant Biology* **10**, 70.
- Gajdošová S, Spíchal L, Kamínek M, Hoyerová K, Novák O, Dobrev PI, Galuszka P, Klíma P, Gaudinová A, Žižková E, Hanuš J, Dančák M, Trávníček B, Pešek B, Krupička M, Vaňková R, Strnad M, Motyka V.** 2011. Distribution, biological activities, metabolism, and the conceivable function of *cis*-zeatin-type cytokinins in plants. *Journal of Experimental Botany* **62**, 2827-2840.
- Gan S, Amasino RM.** 1996. Cytokinins in plant senescence: From spray and pray to clone and play. *Bioessays* **18**, 557-565.
- Gao H, Wang C, Li L, Fu D, Zhang Y, Yang P, Zhang T, Wang C.** 2020. A novel role of the calcium sensor CBL1 in response to phosphate deficiency in *Arabidopsis thaliana*. *Journal of Plant Physiology* **253**, 153266.
- Gookin TE, Assmann SM.** 2014. Significant reduction of BiFC non-specific assembly facilitates in planta assessment of heterotrimeric G-protein interactors. *Plant Journal* **80**, 553-567.
- Guo W, Cong Y, Hussain N, Wang Y, Liu Z, Jiang L, Liang Z, Chen K.** 2014. The remodeling of seedling development in response to long-term magnesium toxicity and regulation by ABA-DELLA signaling in *Arabidopsis*. *Plant Cell Physiology* **55**, 1713-1726.
- Guo WL, Nazim H, Liang ZS, Yang DF.** 2016. Magnesium deficiency in plants: An urgent problem. *Crop Journal* **4**, 83-91.
- Guo Y, Ren G, Zhang K, Li Z, Miao Y, Guo H.** 2021. Leaf senescence: progression, regulation, and application. *Molecular Horticulture* **1**.
- He Y, Fukushige H, Hildebrand DF, Gan S.** 2002. Evidence supporting a role of jasmonic acid in *Arabidopsis* leaf senescence. *Plant Physiology* **128**, 876-884.
- Hermans C, Conn SJ, Chen J, Xiao Q, Verbruggen N.** 2013. An update on magnesium homeostasis mechanisms in plants. *Metallomics* **5**, 1170-1183.
- Hermans C, Hammond JP, White PJ, Verbruggen N.** 2006. How do plants respond to nutrient shortage by biomass allocation? *Trends in Plant Science* **11**, 610-617.
- Hong Y, Zhao J, Guo L, Kim S-C, Deng X, Wang G, Zhang G, Li M, Wang X.** 2016. Plant phospholipases D and C and their diverse functions in stress responses. *Progress in Lipid Research* **62**, 55-74.
- Hu W, Coomer TD, Loka DA, Oosterhuis DM, Zhou Z.** 2017. Potassium deficiency affects the carbon-nitrogen balance in cotton leaves. *Plant Physiology and Biochemistry* **115**, 408-417.
- Hu W, Lv XB, Yang JS, Chen BL, Zhao WQ, Meng YL, Wang YH, Zhou ZG, Oosterhuis DM.** 2016. Effects of potassium deficiency on antioxidant metabolism related to leaf senescence in cotton (*Gossypium hirsutum* L.). *Field Crops Research* **191**, 139-149.
- Huang J, Yan M, Zhu X, Zhang T, Shen W, Yu P, Wang Y, Sang X, Yu G, Zhao B, He G.** 2018. Gene mapping of starch accumulation and premature leaf senescence in the *ossac3* mutant of rice. *Euphytica* **214**, 177.
- Chen ZC, Peng WT, Li J, Liao H.** 2018. Functional dissection and transport mechanism of magnesium in plants. *Seminars in Cell and Developmental Biology* **74**, 142-152.
- Cheng NH, Pittman JK, Barkla BJ, Shigaki T, Hirschi KD.** 2003. The *Arabidopsis cax1* mutant exhibits impaired ion homeostasis, development, and hormonal responses and reveals interplay among vacuolar transporters. *Plant Cell* **15**, 347-364.
- Choudhury SR, Pandey S.** 2016. The role of PLDα1 in providing specificity to signal-response coupling by heterotrimeric G-protein components in *Arabidopsis*. *Plant Journal* **86**, 50-61.
- Jia Y, Li W.** 2015. Characterisation of lipid changes in ethylene-promoted senescence and its retardation by suppression of phospholipase Dd in *Arabidopsis* leaves. *Frontiers in Plant Science* **6**.

- Jia YX, Tao FQ, Li WQ. 2013. Lipid profiling demonstrates that suppressing *Arabidopsis* phospholipase Dd retards ABA-promoted leaf senescence by attenuating lipid degradation. *PLoS ONE* **8**, 11.
- John CF, Morris K, Jordan BR, Thomas B, A-H-Mackerness S. 2001. Ultraviolet-B exposure leads to up-regulation of senescence-associated genes in *Arabidopsis thaliana*. *Journal of Experimental Botany* **52**, 1367-1373.
- Kaplan F, Guy CL. 2004. b-Amylase induction and the protective role of maltose during temperature shock. *Plant Physiology* **135**, 1674-1684.
- Kaur G, Asthir B. 2015. Proline: a key player in plant abiotic stress tolerance. *Biologia Plantarum* **59**, 609-619.
- Kim JI, Murphy AS, Baek D, Lee S-W, Yun D-J, Bressan RA, Narasimhan ML. 2011. *YUCCA6* over-expression demonstrates auxin function in delaying leaf senescence in *Arabidopsis thaliana*. *Journal of Experimental Botany* **62**, 3981-3992.
- Kocourková D, Krčková Z, Pejchar P, Kroumanová K, Podmanická T, Daněk M, Martinec J. 2020. Phospholipase Dα1 mediates the high-Mg<sup>2+</sup> stress response partially through regulation of K<sup>+</sup> homeostasis. *Plant Cell & Environment* **43**, 2460-2475.
- Kolesnikov YS, Nokhrina KP, Kretynin SV, Volotovskii ID, Martinec J, Romanov GA, Kravets VS. 2012. Molecular structure of phospholipase D and regulatory mechanisms of its activity in plant and animal cells. *Biochemistry (Moscow)* **77**, 1-14.
- Krckova Z, Kocourkova D, Danek M, Brouzdova J, Pejchar P, Janda M, Pokotylo I, Ott PG, Valentova O, Martinec J. 2018. The *Arabidopsis thaliana* non-specific phospholipase C2 is involved in the response to *Pseudomonas syringae* attack. *Annals of Botany* **121**, 297-310.
- Li B, Wang Y, Zhang ZY, Wang BM, Eneji AE, Duan LS, Li ZH, Tian XL. 2012. Cotton shoot plays a major role in mediating senescence induced by potassium deficiency. *Journal of Plant Physiology* **169**, 327-335.
- Li Z, Zhao Y, Liu X, Jiang Z, Peng J, Jin J, Guo H, Luo J. 2017. Construction of the Leaf Senescence Database and Functional Assessment of Senescence-Associated Genes. In: van Dijk ADJ, ed. *Plant Genomics Databases: Methods and Protocols*. New York, NY: Springer New York, 315-333.
- Lim PO, Kim HJ, Nam HG. 2007. Leaf senescence. *Annual Review of Plant Biology* **58**, 115-136.
- McLoughlin F, Arisz SA, Dekker HL, Kramer G, de Koster CG, Haring MA, Munnik T, Testerink C. 2013. Identification of novel candidate phosphatidic acid-binding proteins involved in the salt-stress response of *Arabidopsis thaliana* roots. *Biochemical Journal* **450**, 573-581.
- Meng S, Peng JS, He YN, Zhang GB, Yi HY, Fu YL, Gong JM. 2016. *Arabidopsis* NRT1.5 mediates the suppression of nitrate starvation-induced leaf senescence by modulating foliar potassium level. *Molecular Plant* **9**, 461-470.
- Mert-Turk F, Bennett MH, Mansfield JW, Holub EB. 2003. Quantification of camalexin in several accessions of *Arabidopsis thaliana* following inductions with *Peronospora parasitica* and UV-B irradiation. *Phytoparasitica* **31**, 81.
- Miller JD, Arteca RN, Pell EJ. 1999. Senescence-associated gene expression during ozone-induced leaf senescence in *Arabidopsis*<sup>1</sup>. *Plant Physiology* **120**, 1015-1024.
- Miura K, Tada Y. 2014. Regulation of water, salinity, and cold stress responses by salicylic acid. *Frontiers in Plant Science* **5**.
- Mogami J, Fujita Y, Yoshida T, Tsukiori Y, Nakagami H, Nomura Y, Fujiwara T, Nishida S, Yanagisawa S, Ishida T, Takahashi F, Morimoto K, Kidokoro S, Mizoi J, Shinozaki K, Yamaguchi-Shinozaki K. 2015. Two distinct families of protein kinases are required for plant growth under high external Mg<sup>2+</sup> concentrations in *Arabidopsis*. *Plant Physiology* **167**, 1039-1057.
- Niu Y, Chen P, Zhang Y, Wang Z, Hu S, Jin G, Tang C, Guo L. 2018. Natural variation among *Arabidopsis thaliana* accessions in tolerance to high magnesium supply. *Scientific Reports* **8**, 13640.



- Niu Y, Jin G, Li X, Tang C, Zhang Y, Liang Y, Yu J.** 2015. Phosphorus and magnesium interactively modulate the elongation and directional growth of primary roots in *Arabidopsis thaliana* (L.) Heynh. *Journal of Experimental Botany* **66**, 3841-3854.
- Oda-Yamamizo C, Mitsuda N, Sakamoto S, Ogawa D, Ohme-Takagi M, Ohmiya A.** 2016. The NAC transcription factor ANAC046 is a positive regulator of chlorophyll degradation and senescence in *Arabidopsis* leaves. *Scientific Reports* **6**, 23609.
- Pangesti N, Reichelt M, van de Mortel JE, Kapsomenou E, Gershenzon J, van Loon JJA, Dicke M, Pineda A.** 2016. Jasmonic acid and ethylene signaling pathways regulate glucosinolate levels in plants during Rhizobacteria-induced systemic resistance against a leaf-chewing herbivore. *Journal of Chemical Ecology* **42**, 1212-1225.
- Pejchar P, Potocký M, Novotná Z, Veselková Š, Kocourková D, Valentová O, Schwarzerová K, Martinec J.** 2010. Aluminium ions inhibit the formation of diacylglycerol generated by phosphatidylcholine-hydrolysing phospholipase C in tobacco cells. *New Phytologist* **188**, 150-160.
- Pokotylo I, Kravets V, Martinec J, Ruelland E.** 2018. The phosphatidic acid paradox: Too many actions for one molecule class? Lessons from plants. *Progress in Lipid Research* **71**, 43-53.
- Prerostova S, Cerny M, Dobrev PI, Motyka V, Hluskova L, Zupkova B, Gaudinova A, Knirsch V, Janda T, Brzobohaty B, Vankova R.** 2021. Light regulates the cytokinin-dependent cold stress responses in *Arabidopsis*. *Frontiers in Plant Science* **11**.
- Qadir M, Schubert S, Oster JD, Sposito G, Minhas PS, Cheraghi SAM, Murtaza G, Mirzabaev A, Saqib M.** 2018. High-magnesium waters and soils: Emerging environmental and food security constraints. *Science of the Total Environment* **642**, 1108-1117.
- Ragel P, Ródenas R, García-Martín E, Andrés Z, Villalta I, Nieves-Cordones M, Rivero RM, Martínez V, Pardo JM, Quintero FJ, Rubio F.** 2015. The CBL-interacting protein kinase CIPK23 regulates HAK5-mediated high-affinity K<sup>+</sup> uptake in *Arabidopsis* roots. *Plant Physiology* **169**, 2863-2873.
- Rajashekar CB, Zhou H-E, Zhang Y, Li W, Wang X.** 2006. Suppression of phospholipase Da1 induces freezing tolerance in *Arabidopsis*: Response of coldresponsive genes and osmolyte accumulation. *Journal of Plant Physiology* **163**, 916-926.
- Raza A, Charagh S, Zahid Z, Mubarak MS, Javed R, Siddiqui MH, Hasanuzzaman M.** 2020. Jasmonic acid: a key frontier in conferring abiotic stress tolerance in plants. *Plant Cell Reports*.
- Ritchie RJ.** 2006. Consistent sets of spectrophotometric chlorophyll equations for acetone, methanol and ethanol solvents. *Photosynthesis Research* **89**, 27-41.
- Ruelland E, Kravets V, Derevyanchuk M, Martinec J, Zachowski A, Pokotylo I.** 2015. Role of phospholipid signalling in plant environmental responses. *Environmental And Experimental Botany* **114**, 129-143.
- Sade N, Rubio-Wilhelmi MD, Umnajkitikorn K, Blumwald E.** 2018. Stress-induced senescence and plant tolerance to abiotic stress. *Journal of Experimental Botany* **69**, 845-853.
- Sánchez-Barrena MJ, Chaves-Sanjuan A, Raddatz N, Mendoza I, Cortés Á, Gago F, González-Rubio JM, Benavente JL, Quintero FJ, Pardo JM, Albert A.** 2020. Recognition and activation of the plant AKT1 potassium channel by the kinase CIPK23. *Plant Physiology* **182**, 2143-2153.
- Santos V.** 2001. *In situ* and *in vitro* senescence induced by KCl stress: nutritional imbalance, lipid peroxidation and antioxidant metabolism. *Journal of Experimental Botany* **52**, 351-360.
- Selmann MA, Stingl NE, Lautenschlaeger JK, Kruschke M, Mueller MJ, Berger S.** 2010. Differential impact of lipoxygenase 2 and jasmonates on natural and stress-induced senescence in *Arabidopsis*. *Plant Physiology* **152**, 1940-1950.
- Schaffer AA, Nerson H, Zamski E.** 1991. Premature leaf chlorosis in cucumber associated with high starch accumulation. *Journal of Plant Physiology* **138**, 186-190.
- Singh S, Letham DS, Palni LMS.** 1992. Cytokinin biochemistry in relation to leaf senescence. VII. Endogenous cytokinin levels and exogenous applications of cytokinins in relation to sequential leaf senescence of tobacco. *Physiologia Plantarum* **86**, 388-397.

- Skirycz A, De Bodt S, Obata T, De Clercq I, Claeys H, De Rycke R, Andriankaja M, Van Aken O, Van Breusegem F, Fernie AR, Inzé D.** 2009. Developmental stage specificity and the role of mitochondrial metabolism in the response of *Arabidopsis* leaves to prolonged mild osmotic stress. *Plant Physiology* **152**, 226-244.
- Szabados L, Savoure A.** 2009. Proline: a multifunctional amino acid. *Trends in Plant Science* **15**, 89-97.
- Tang RJ, Zhao FG, Garcia VJ, Kleist TJ, Yang L, Zhang HX, Luan S.** 2015. Tonoplast CBL-CIPK calcium signaling network regulates magnesium homeostasis in *Arabidopsis*. *Proceedings of the National Academy of Sciences* **112**, 3134-3139.
- Tanoi K, Kobayashi NI.** 2015. Leaf senescence by magnesium deficiency. *Plants* **4**, 756-772.
- Testerink C, Dekker HL, Lim ZY, Johns MK, Holmes AB, Koster CG, Ktistakis NT, Munnik T.** 2004. Isolation and identification of phosphatidic acid targets from plants. *Plant Journal* **39**, 527-536.
- Testerink C, Larsen PB, van der Does D, van Himbergen JAJ, Munnik T.** 2007. Phosphatidic acid binds to and inhibits the activity of *Arabidopsis* CTR1. *J. Exp. Bot.* **58**, 3905-3914.
- Thierry L, Leprince AS, Lefebvre D, Ali Ghars M, Debarbieux E, Savoure A.** 2004. Phospholipase D is a negative regulator of proline biosynthesis in *Arabidopsis thaliana*. *Journal of Biological Chemistry* **279**, 14812-14818.
- Uzelac B, Janošević D, Simonović A, Motyka V, Dobrev PI, Budimir S.** 2016. Characterization of natural leaf senescence in tobacco (*Nicotiana tabacum*) plants grown in vitro. *Protoplasma* **253**, 259-275.
- Visscher AM, Paul AL, Kirst M, Guy CL, Schuerger AC, Ferl RJ.** 2010. Growth performance and root transcriptome remodeling of *Arabidopsis* in response to Mars-like levels of magnesium sulfate. *PLoS ONE* **5**, e12348.
- Wang CY, Cheng SH, Kao CH.** 1982. Senescence of Rice Leaves: VII. Proline accumulation in senescing excised leaves. *Plant Physiology* **69**, 1348-1349.
- Wang XM, Guo L, Wang GL, Li MY.** 2014. PLD: Phospholipase Ds in Plant Signaling. In: Wang X, ed. *Phospholipases in Plant Signaling*, Vol. 20. Berlin: Springer-Verlag Berlin, 3-26.
- Wang Y, Li B, Du MW, Eneji AE, Wang BM, Duan LS, Li ZH, Tian XL.** 2012. Mechanism of phytohormone involvement in feedback regulation of cotton leaf senescence induced by potassium deficiency. *Journal of Experimental Botany* **63**, 5887-5901.
- Weaver LM, Gan S, Quirino B, Amasino RM.** 1998. A comparison of the expression patterns of several senescence-associated genes in response to stress and hormone treatment. *Plant Molecular Biology* **37**, 455-469.
- Xiao L, Jiang S, Huang P, Chen F, Wang X, Cheng Z, Miao Y, Liu L, Searle I, Liu C, Wu X-X, Fu Y-F, Chen Q, Zhang X-M.** 2020. Two *Nucleoporin98* homologous genes jointly participate in the regulation of starch degradation to repress senescence in *Arabidopsis*. *BMC Plant Biology* **20**, 292.
- Xiao S, Gao W, Chen QF, Chan SW, Zheng SX, Ma J, Wang M, Welti R, Chye ML.** 2010. Overexpression of *Arabidopsis* acyl-CoA binding protein ACBP3 promotes starvation-induced and age-dependent leaf senescence. *Plant Cell* **22**, 1463-1482.
- Yamanaka T, Nakagawa Y, Mori K, Nakano M, Imamura T, Kataoka H, Terashima A, Iida K, Kojima I, Katagiri T, Shinozaki K, Iida H.** 2010. MCA1 and MCA2 that mediate  $Ca^{2+}$  uptake have distinct and overlapping roles in *Arabidopsis*. *Plant Physiology* **152**, 1284-1296.
- Yan YW, Mao DD, Yang L, Qi JL, Zhang XX, Tang QL, Li YP, Tang RJ, Luan S.** 2018. Magnesium transporter MGT6 plays an essential role in maintaining magnesium homeostasis and regulating high magnesium tolerance in *Arabidopsis*. *Frontiers in Plant Science* **9**, 274.
- Yang T, Wang L, Li C, Liu Y, Zhu S, Qi Y, Liu X, Lin Q, Luan S, Yu F.** 2015. Receptor protein kinase FERONIA controls leaf starch accumulation by interacting with glyceraldehyde-3-phosphate dehydrogenase. *Biochemical and Biophysical Research Communications* **465**, 77-82.

- Yang Y, Tang RJ, Mu B, Ferjani A, Shi J, Zhang H, Zhao F, Lan WZ, Luan S.** 2018. Vacuolar proton pyrophosphatase is required for high magnesium tolerance in *Arabidopsis*. *International Journal of Molecular Sciences* **19**, 3617.
- Yao HY, Xue HW.** 2018. Phosphatidic acid plays key roles regulating plant development and stress responses. *Journal of Integrative Plant Biology* **60**, 851-863.
- Yu HQ, Yong TM, Li HJ, Liu YP, Zhou SF, Fu FL, Li WC.** 2015. Overexpression of a phospholipase Da gene from *Ammopiptanthus nanus* enhances salt tolerance of phospholipase Da1-deficient *Arabidopsis* mutant. *Planta* **242**, 1495-1509.
- Yu L, Nie J, Cao C, Jin Y, Yan M, Wang F, Liu J, Xiao Y, Liang Y, Zhang W.** 2010. Phosphatidic acid mediates salt stress response by regulation of MPK6 in *Arabidopsis thaliana*. *New Phytologist* **188**, 762-773.
- Zhang H, Zhou C.** 2013. Signal transduction in leaf senescence. *Plant Mol Biol* **82**, 539-545.
- Zhang K, Xia X, Zhang Y, Gan S-S.** 2012a. An ABA-regulated and Golgi-localized protein phosphatase controls water loss during leaf senescence in *Arabidopsis*. *Plant Journal* **69**, 667-678.
- Zhang L, Becker DF.** 2015. Connecting proline metabolism and signaling pathways in plant senescence. *Frontiers in Plant Science* **6**, 552.
- Zhang Q, Lin F, Mao TL, Nie JN, Yan M, Yuan M, Zhang WH.** 2012b. Phosphatidic acid regulates microtubule organization by interacting with MAP65-1 in response to salt stress in *Arabidopsis*. *Plant Cell* **24**, 4555-4576.
- Zhang WH, Qin CB, Zhao J, Wang XM.** 2004. Phospholipase D $\alpha$ 1-derived phosphatidic acid interacts with ABI1 phosphatase 2C and regulates abscisic acid signaling. *Proceedings of the National Academy of Sciences of the United States of America* **101**, 9508-9513.
- Zhang Y, Zhao L, Zhao J, Li Y, Wang J, Guo R, Gan S, Liu C-J, Zhang K.** 2017. S5H/DMR6 encodes a salicylic acid 5-hydroxylase that fine-tunes salicylic acid homeostasis. *Plant Physiology* **175**, 1082-1093.
- Zhang YY, Zhu HY, Zhang Q, Li MY, Yan M, Wang R, Wang LL, Welti R, Zhang WH, Wang XM.** 2009. Phospholipase D $\alpha$ 1 and phosphatidic acid regulate NADPH oxidase activity and production of reactive oxygen species in ABA-mediated stomatal closure in *Arabidopsis*. *Plant Cell* **21**, 2357-2377.
- Zhao J, Wang XM.** 2004. *Arabidopsis* phospholipase Da1 interacts with the heterotrimeric G-protein  $\alpha$ -subunit through a motif analogous to the DRY motif in G-protein-coupled receptors. *Journal of Biological Chemistry* **279**, 1794-1800.
- Zhao J, Williams CC, Last RL.** 1998. Induction of *Arabidopsis* tryptophan pathway enzymes and camalexin by amino acid starvation, oxidative stress, and an abiotic elicitor. *Plant Cell* **10**, 359-370.

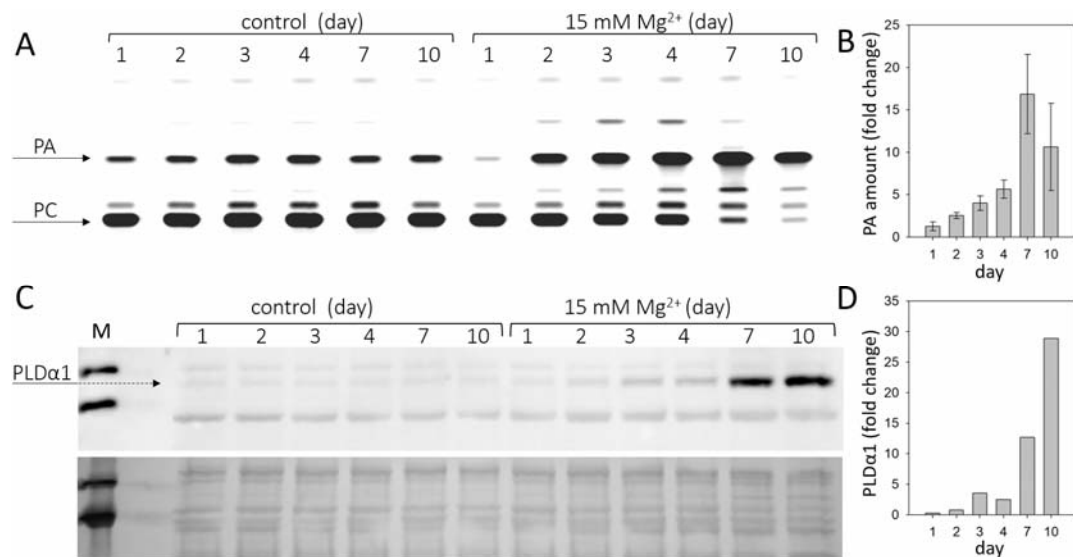

**Fig. 1.** Phospholipase D $\alpha$ 1 activity and amount increases in response to high Mg<sup>2+</sup> stress. 24-day-old hydroponically grown plants were treated with 15 mM MgSO<sub>4</sub> and sampled after 1, 2, 3, 4, 7 and 10 days after the treatment. (A) Thin layer plate showing phosphatidic acid, product of PLD $\alpha$ 1 activity. PLD $\alpha$ 1 activity was measured in leave extracts from leaves 3-6 from plants treated with MgSO<sub>4</sub>. (B) Relative increase of PA with MgSO<sub>4</sub> treatment over time. Values represent mean  $\pm$  SE, n=3 biological experiments. (C) Western blot detection of PLD $\alpha$ 1 in protein extracts from leaves. Each lane was run with 15  $\mu$ g of protein, upper panel – western blot, lower panel – loading control - membrane stained with Novex reversible membrane protein stain. (D) Quantification of PLD $\alpha$ 1 protein. The experiments were repeated three times with similar results. PA, phosphatidic acid, PC, phosphatidylcholine, M, molecular marker.

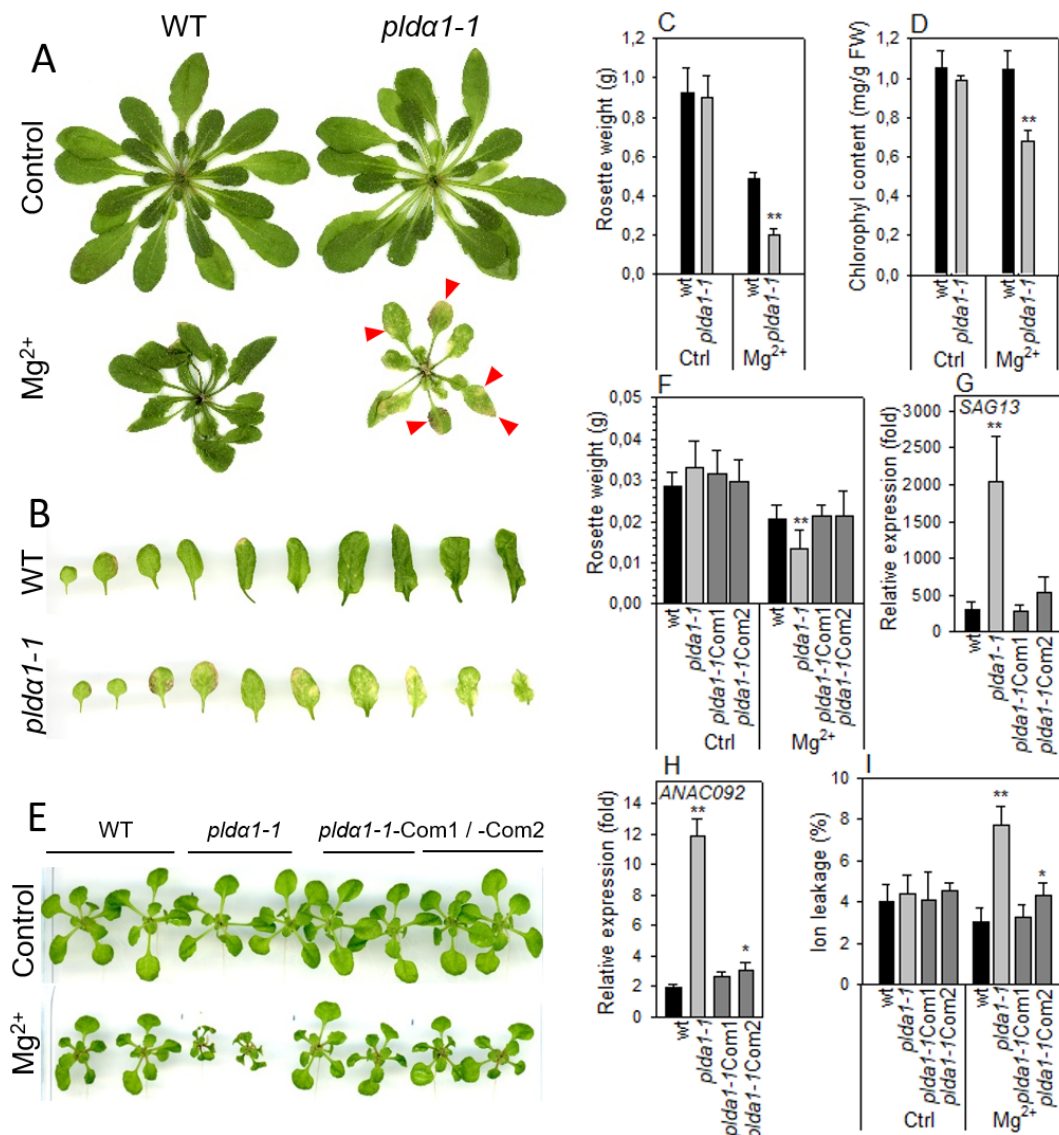

**Fig. 2.** High  $Mg^{2+}$  leads to premature senescence in *plda1-1*. (A) Phenotype of WT and *plda1-1* grown hydroponically on high  $Mg^{2+}$ , red arrows point to senescent parts of leaves. (B) Leaves of plants grown on high  $Mg^{2+}$ . (C) Weight of rosettes. (D) Chlorophyll content, A-D - three-week-old hydroponically grown plants were treated with 15 mM  $MgSO_4$  and grown for another 16 days, values represent means  $\pm$  SD,  $n=6$ . (E) Phenotype of WT, *plda1-1*, *plda1-1Com1* and *plda1-1Com2* plants grown on agar plates on high  $Mg^{2+}$ . (F) Weight of rosettes. (G), (H) Transcript level of *SAG13* and *ANAC092* in rosettes. Transcription was normalised to a reference gene *SAND* and the transcription of non-treated plants was set to one. Values represent means  $\pm$  SE,  $n=12$ . (I) Ion leakage, values represent means  $\pm$  SD,  $n=7$ . E-I - ten-day-old Arabidopsis seedlings were transferred on agar plates containing 15 mM  $MgCl_2$  and grown for another 7 days, Student's T-test, asterisk indicate significant difference in comparison with WT \*  $P<0.05$ ; \*\*  $P<0.01$ .

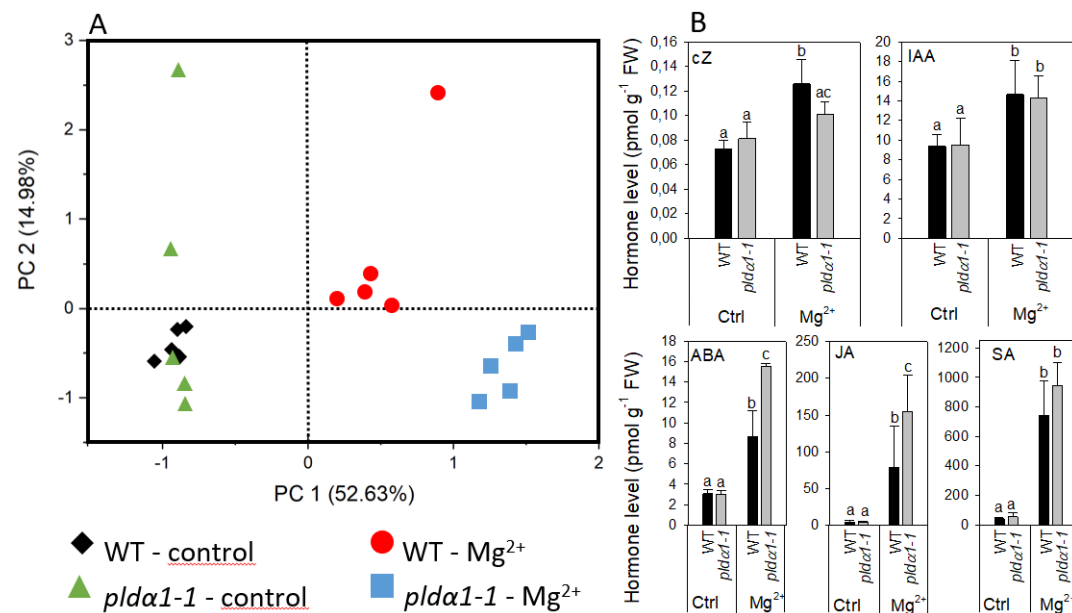

**Fig. 3.** Levels of plant hormone are altered in high-Mg<sup>2+</sup> conditions. (A) PCA analysis. (B) Level of cZ – cis-zeatin, IAA – indole-3-acetic acid, ABA – abscisic acid, JA – jasmonic acid and SA – salicylic acid. 24-day-old hydroponically grown plants were treated with 15 mM MgSO<sub>4</sub> and grown for another 2 days. Leaves 3-6 were used for hormone analysis. Values represent means ± SD, n=5, letters above the bars indicate significant differences, one-way ANOVA with Tukey's post hoc test, p<0.05.

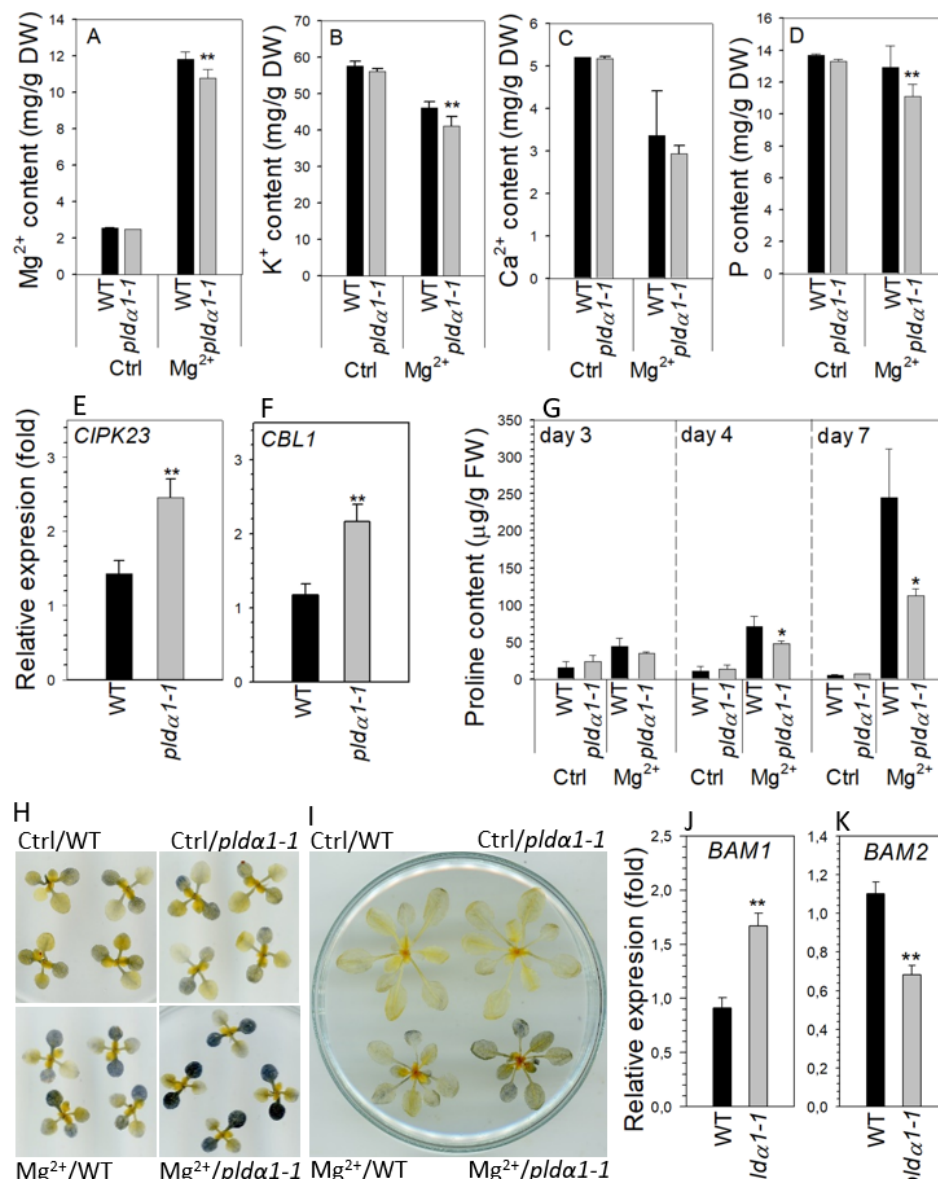

**Fig. 4.** Nutrient, proline and starch content is altered in *pldα1-1* in high- $Mg^{2+}$  conditions. (A), (B), (C), (D) Magnesium, potassium, calcium and phosphorus content in rosettes of WT and *pldα1-1* plants. Bars represents means  $\pm$  SD, n=3 for control, n=8 for  $Mg$  treatment. (E), (F) Transcript level of *CIPK23* and *CBL1* in rosettes. Transcription was normalised to a reference gene *SAND* and the transcription of non-treated plants was set to one. Values represent means  $\pm$  SE, n=12, A-F 10-day-old Arabidopsis seedlings were transferred on agar plates containing 15 mM  $MgSO_4$  for 7 days. (G) Proline content, 24-day-old hydroponically grown plants were treated with 15 mM  $MgSO_4$ . Proline content was measured in leaves 3-6. (H) Lugol staining of starch in rosettes from control and high  $Mg^{2+}$  condition at the end of dark period. 10-day-old Arabidopsis seedlings were transferred on agar plates containing 15 mM  $MgSO_4$  for 3 days. (I) Lugol staining of starch in rosettes from control and high  $Mg^{2+}$  condition at the end of dark period, 24-day-old hydroponically grown plants were treated with 15 mM  $MgSO_4$  for 3 days. (J), (K) Transcript level of *BAM1* and *BAM2* in leaves 3-6, 24-day-old hydroponically grown plants were treated with 15 mM  $MgSO_4$  for 2 days, transcription was normalised to a reference gene *SAND* and the transcription of non-treated plants was set to one.

Values represent means  $\pm$  SE, n=12. Student's T-test, asterisk indicate significant difference in comparison with WT \* P<0.05; \*\* P<0.01.
